# Supplementary material
Source: PubMed Central journal article supplement (PMC4125384)
Supplement: 4dc347ff1c729fc387596b8dfc703c79_genetics.114.166389-4.pdf [file 4dc347ff1c729fc387596b8dfc703c79_genetics.114.166389-4.pdf]

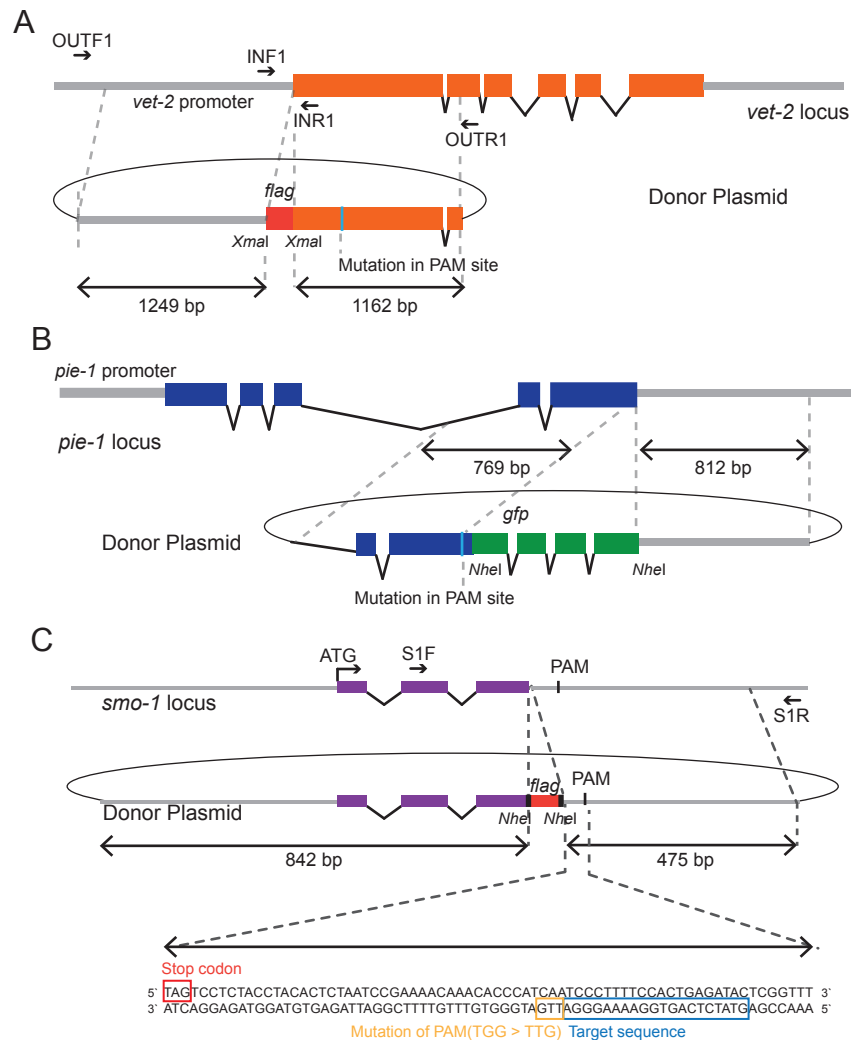

Figure S3. HR donor plasmids used in Co-CRISPR experiments. (A) Schematic of the *flag::vet-2* donor plasmid. The *flag* coding sequence was inserted immediately after the *vet-2* start codon and flanked by ~1200 bp homology arms. (B) Schematic of the *pie-1::gfp* donor plasmid. (C) Schematic of the *smo-1::flag* donor plasmid. The donor plasmid includes *flag* coding sequence immediately before the *smo-1* stop codon and asymmetrical homology arms (~800 bp and ~500 bp) flanking the target site, and the Cas9/sgRNA target sequence is located in the 3'UTR of *smo-1*. The PAM sites mutated in each donor indicate the locations of the Cas9/sgRNA target sites.
