# Supplementary material
Source: PubMed Central journal article supplement (PMC4125384)
Supplement: d69a82dbe44eb604db765fc9769bf38b_genetics.114.166389-1.pdf [file d69a82dbe44eb604db765fc9769bf38b_genetics.114.166389-1.pdf]

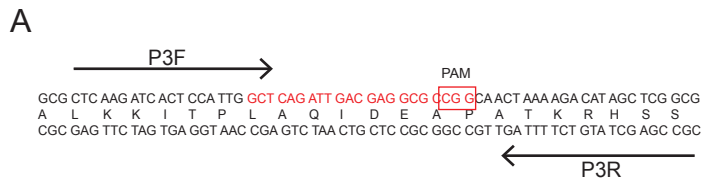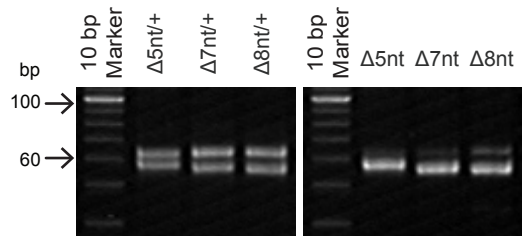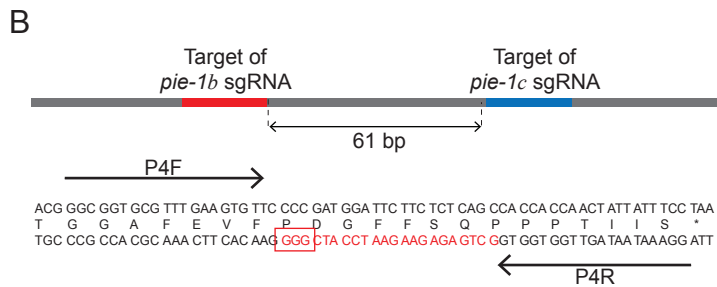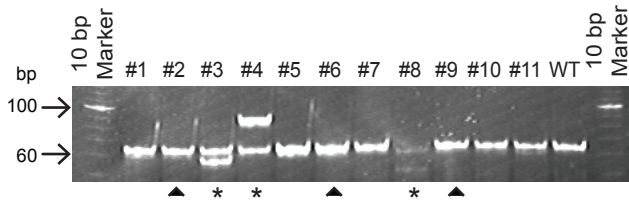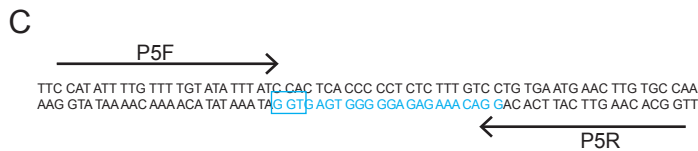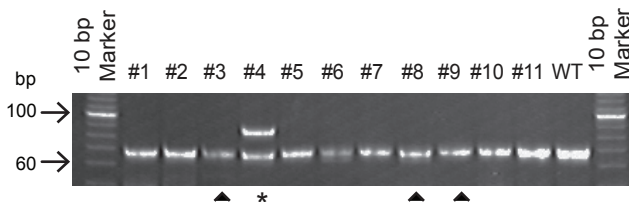

Figure S1. Detecting small indels on 15% polyacrylamide gels. (A) The indicated primers (arrows) were used to amplify sequences immediately surrounding the CRISPR-Cas9 target site (red). The indels in this experiment were from an HR experiment, so an initial PCR was performed using primers outside of the homology arms of the donor template (Figure S2A). The initial PCR was used as a template to amplify the target site using the indicated primers. PCR products from F1 heterozygotes (left) and F2 homozygotes (right) were separated on a non-denaturing 15% polyacrylamide gel and stained with ethidium bromide. The asterisk indicates the PCR product amplified from residual donor plasmids in the single worm lysate (B) and (C) Test of two uncharacterized *pie-1* sgRNAs using the Co-CRISPR strategy and PAGE analysis. The *pie-1* sgRNA vectors were combined and co-injected with the *unc-22* sgRNA, Cas9, and *rol-6* plasmids. The *pie-1* sgRNA target sites (shown in red and blue) are separated by 61 bp. As this experiment did not include an HR donor, only a single round of PCR was performed with the indicated primers (arrows). We lysed 11 F1 animals with the twitching phenotype (#3, #8, and #9-11) or that produced twitching progeny (#1-2 and #4-7). WT, wild type N2 genomic DNA was used as a template. Asterisks indicate lanes in which small indels were detected. The filled triangles indicate lanes in which the primer pair could not detect the indels.

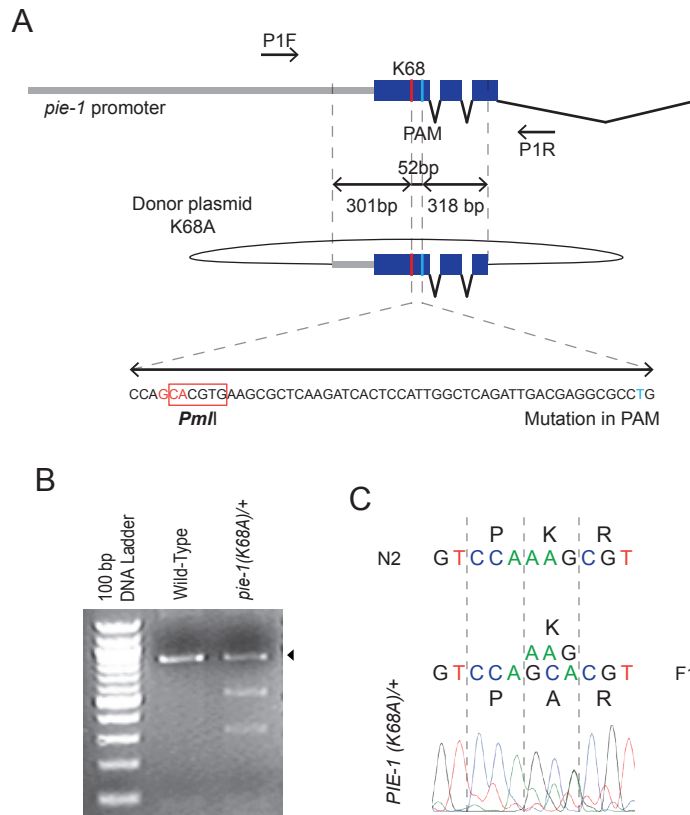

Figure S2. Site-specific mutagenesis of *pie-1* by HR. (A) Schematic of the Cas9/sgRNA target sites in *pie-1* locus and donor plasmids. The K68A donor plasmid contains ~300 bp of homology flanking the 52 bp target region between the K68 codon and PAM site and introduces a *Pml* restriction site (red box). The PAM site of each donor was disrupted by silent mutations so that it will not be targeted by CRISPR-Cas9. The blue bar indicates the PAM site, and the red bar indicates the position of K68. (B) PCR and restriction enzyme analysis of wild type control worms and F1 rollers from K68A CRISPR-Cas9-mediated HR experiments. PCR primers outside of the donor homology arms (P1F and P1R for K68A) are indicated in (A). Restriction analysis following PCR shows the RFLP in *pie-1(K68A)/+*. The wild type product is indicated by the filled triangle. (C) DNA sequence analyses to confirm the desired point mutations. Note that the PCR products for sequencing were amplified using the primers outside of donor plasmid, as indicated in (A).

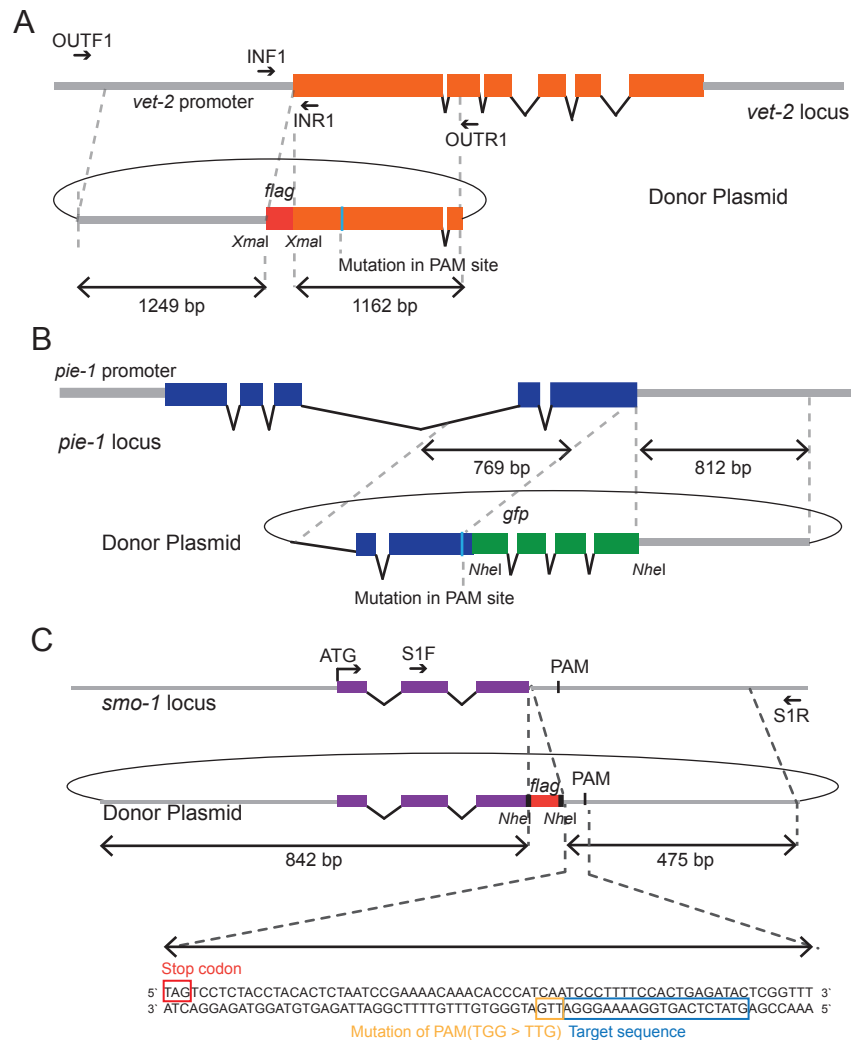

Figure S3. HR donor plasmids used in Co-CRISPR experiments. (A) Schematic of the *flag::vet-2* donor plasmid. The *flag* coding sequence was inserted immediately after the *vet-2* start codon and flanked by ~1200 bp homology arms. (B) Schematic of the *pie-1::gfp* donor plasmid. (C) Schematic of the *smo-1::flag* donor plasmid. The donor plasmid includes *flag* coding sequence immediately before the *smo-1* stop codon and asymmetrical homology arms (~800 bp and ~500 bp) flanking the target site, and the Cas9/sgrRNA target sequence is located in the 3'UTR of *smo-1*. The PAM sites mutated in each donor indicate the locations of the Cas9/sgrRNA target sites.

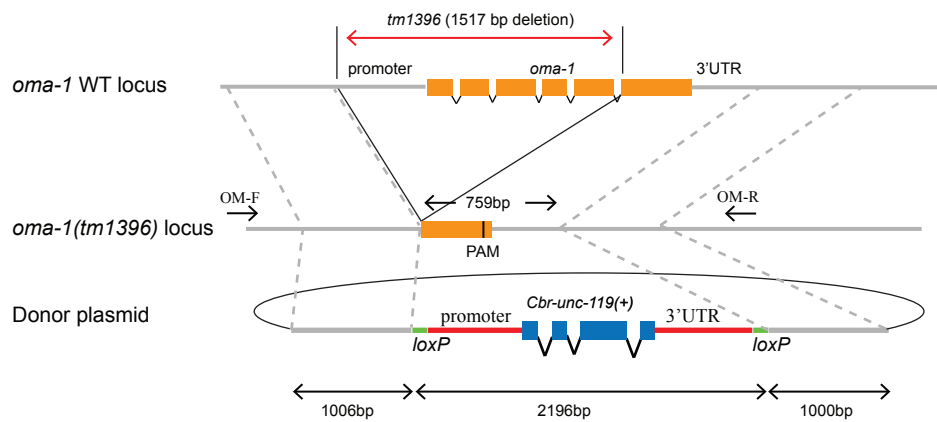

Figure S4. Selection/counterselection experiment to delete the entire *oma-1(tm1396)* locus. Schematic of the Cas9/sgRNA target site and the donor plasmid containing *Cbr-unc-119(+)* flanked by *loxP* sites and 1 kb homology arms. The indicated primers OM-F and OM-R were used for PCR analysis.

**Table S1.** Summary of sgRNAs sequences and their efficiency

| Name                | Sequence                  | S/AS | % efficiency |
|---------------------|---------------------------|------|--------------|
| <i>avr-14</i> no.1  | GAATATTGAAAGACTATGAT(TGG) | S    | 10           |
| <i>avr-14</i> no.2  | GATTGGAGAGTTAGACCACG(TGG) | S    | 20           |
| <i>avr-15</i> no.9  | GCAGAAAATGAATGTCATAC(AGG) | AS   | HIGH         |
| <i>avr-15</i> no.10 | GTTTGCAATATAAGTCACCC(AGG) | AS   | HIGH         |
| <i>unc-22</i> no.2  | GAACCCGTTGCCGAATACAC(AGG) | S    | 5            |
| <i>unc-22</i> no.9  | GCCTTTGCTTCGATTTTCTT(TGG) | AS   | 0            |
| <i>unc-4</i> no.1   | GTTATCGTCATCCGGTGACG(TGG) | AS   | 10           |
| <i>rde-3</i> no.3   | GAATTTGAGCTTGAACGAGC(TGG) | AS   | LOW          |
| <i>rde-3</i> no.4   | GTCGATACTTCAAATTAAT(TGG)  | AS   | LOW          |
| <i>lon-2</i> no.1   | GGGAAACTATACCCTCACTG(TGG) | S    | 30           |
| <i>dpy-11</i> no.2  | GCAAGGATCTTCAAAAAGCA(CGG) | S    | 0.4          |
| <i>dpy-11</i> no.4  | GATGCTTGTAGTCTGGAAC(TGG)  | AS   |              |
| <i>unc-32</i> no.1  | GATAGGAAGCATCAGATTGA(AGG) | AS   | 0            |
| <i>unc-32</i> no.2  | GTTGCTGAACTGGGAGAGCT(CGG) | S    |              |
| <i>bli-2</i> no.1   | GGATTTGCTGCTACTGAATC(CGG) | AS   | 0            |
| <i>bli-2</i> no.2   | GATGGACGGGATGGTAGAGA(TGG) | S    |              |
| <i>dpy-5</i> no.2   | GTCGGATTCGGCGCTGCATG(CGG) | S    | 0            |
| <i>dpy-5</i> no.3   | GGTTTCCTGGAGCTCCGGCT(GGG) | AS   |              |
| <i>ben-1</i> no.3   | GGATATCACTTCCCAGAACT(TGG) | AS   | 0            |
| <i>ben-1</i> no.5   | GGGAGAAAGTGATTTGCAGT(TGG) | S    |              |
| <i>pie-1</i> a      | GGCTCAGATTGACGAGGCGC(CGG) | S    | 24           |
| <i>pie-1</i> b      | GCTGAGAGAAGAATCCATCG(GGG) | AS   | 15           |
| <i>pie-1</i> c      | GGACAAAGAGAGGGGGTGAG(TGG) | AS   | 7.5          |
| <i>pie-1</i> d      | GTTGAGTGCAGCCATTTGCT(CGG) | AS   | 5            |
| <i>smo-1</i> a      | GCCGATGATGCAGCTCAAGC(AGG) | S    | LOW          |
| <i>smo-1</i> b      | GTGCACTTCCGTGTAAAGTA(TGG) | S    | HIGH         |
| <i>smo-1</i> c      | GTCTACCAAGAGCAGCTGGG(CGG) | S    | HIGH         |
| <i>smo-1</i> d      | GTATCTCAGTGGAAGGGGA(TGG)  | S    | HIGH         |
| <i>vet-2</i>        | GTTGGATCATAGGATACCGG(TGG) | AS   | 38           |
| C35E7.6             | GGGCACCATACCGAGTGATG(GGG) | AS   | 100          |
| <i>oma-1</i>        | GATCCAATGATGTCATGTAA(CGG) | S    | LOW          |

**Table S2.** Summary of primer sequences for sgRNA plasmid generation

| Name                   | Sequence                                  |
|------------------------|-------------------------------------------|
| CMo16428               | TGAATTCCTCCAAGAACTCG                      |
| CMo16429               | AAGCTTCACAGCCGACTATG                      |
| sgRNA_F                | G(N)19GTTTTAGAGCTAGAAATAGC                |
| <i>avr-14</i> sgRNA_F  | GATTGGAGAGTTAGACCACGGTTTTAGAGCTAGAAATAGC  |
| <i>avr-15</i> sgRNA_F  | GTTTGAATATAAGTCACCCGTTTTAGAGCTAGAAATAGC   |
| <i>unc-22</i> sgRNA_F  | GAACCCGTTGCCGAATACACGTTTTAGAGCTAGAAATAGC  |
| <i>pie-1 a</i> sgRNA_F | GGCTCAGATTGACGAGGCGGTTTTAGAGCTAGAAATAGC   |
| <i>pie-1 b</i> sgRNA_F | GCTGAGAGAAGAATCCATCGGTTTTAGAGCTAGAAATAGC  |
| <i>pie-1 c</i> sgRNA_F | GGACAAAGAGAGGGGGTGAGTTTTAGAGCTAGAAATAGC   |
| <i>smo-1</i> sgRNA_F   | GTATCTCAGTGAAAAGGGAGTTTTAGAGCTAGAAATAGC   |
| <i>vet-2</i> sgRNA_F   | GTTGGATCATAGGATACCGGGTTTTAGAGCTAGAAATAGC  |
| <i>oma-1</i> sgRNA F   | GATCCAATGATGTCATGTAAGTTTTAGAGCTAGAAATAGC  |
| sgRNA_R                | (N)19CAAACATTTAGATTTGCAATTC               |
| <i>avr-14</i> sgRNA_R  | CGTGGTCTAACTCTCCAATCAAACATTTAGATTTGCAATTC |
| <i>avr-15</i> sgRNA_R  | GGGTGACTTATATTGCAAACAAACATTTAGATTTGCAATTC |
| <i>unc-22</i> sgRNA_R  | GTGTATTCGGCAACGGGTTCAAACATTTAGATTTGCAATTC |
| <i>pie-1 a</i> sgRNA_R | GCGCCTCGTCAATCTGAGCCAAACATTTAGATTTGCAATTC |
| <i>pie-1 b</i> sgRNA_R | CGATGGATTCTTCTCTCAGCAAACATTTAGATTTGCAATTC |
| <i>pie-1 c</i> sgRNA_R | CTCACCCCCTCTCTTTGTCCAAACATTTAGATTTGCAATTC |
| <i>smo-1</i> sgRNA_R   | TCCCTTTTCCACTGAGATACAAACATTTAGATTTGCAATTC |
| <i>vet-2</i> sgRNA_R   | CCGGTATCCTATGATCCAACAAACATTTAGATTTGCAATTC |
| <i>oma-1</i> sgRNA R   | TTACATGACATCATTGGATCCAACATTTAGATTTGCAATTC |

**Table S3.** Summary of primer sequences for repair template and PCR screening

| Name               | Sequence                       |
|--------------------|--------------------------------|
| C_PIE-1 PF         | ATAGCCCGATTTTGGAGGTG           |
| C_PIE-1 PR         | CCTCGAATTTTGGCAATTTTTC         |
| C_PIE-1 301L       | ATGGATTTCTCGCCGTTTTTTC         |
| C_PIE-1 318R       | GTTGTATCCACGTCGTCTCG           |
| C_PIE-1(K68A)_F    | GGAAAATGGCTTCGTCCAGCACGTGAAGCG |
| C_PIE-1(K68A)_R    | CTTGAGCGCTTCACGTGCTGGACGAAGCC  |
| C_PIE-1(K68R)_F    | GGAAAATGGCTTCGTCCAGCACGTGAAGCG |
| C_PIE-1(K68R)_R    | CTTGAGCGCTTCACGCCTAGGACGAAGCC  |
| C_PIE-1 a MF       | GCTATGTCTTTTAGTTGCAGGCGCCTC    |
| C_PIE-1 a MR       | CAGATTGACGAGGCGCCTGCAACTAA     |
| SMO-1 PF           | CGATTTTTCGGCTCATTTCG           |
| SMO-1 PR           | CCTCGTCAAATCCGAAATCG           |
| SMO MF             | CACCCATCAATCCCTTTTC            |
| SMO MR             | GAAAAGGGATTGATGGGTG            |
| P1F                | GTTTTTGCCCCCAAATTC             |
| P1R                | TGATGCTTCGATGCTGAAGA           |
| P2F                | GGCGTCAAAAGACATATGTAAAAG       |
| P2R                | CGCAATGGATGATTTTGTGTC          |
| P3F                | GCCGAGCTATGTCTTTTAG            |
| P3R                | CTCAAGATCACTCCATTGGC           |
| P4F                | GGCGGTGCGTTTGAAGTGT            |
| P4R                | GGAAATAATAGTTGGTGGTGGC         |
| P5F                | CCATATTTTGTTTTGTATATTTATC      |
| P5R                | GGCACAAGTTCATTACAGG            |
| P6F                | GCGCAGCGAATTTTGGGGT            |
| P6R                | TATCACAATTCTCTCCGTGC           |
| P7R                | CGGAGAACTTGCCAAAATGAAG         |
| S1F                | GAAGTGCACCTCCGTGTAAAGTATGGAACC |
| S1R                | CCGGCTGCTATTTTCATTGAT          |
| MC. OUT F1 (vet-2) | GCTCAAGAAAGCCAATGGAG           |
| MC. OUT R1 (vet-2) | TTCTGAACCAGTCGATGCAG           |
| MC.IN F1 (vet-2)   | ATGGAGGGATCTGTCAATGG           |
| MC.IN R1 (vet-2)   | TGGCAGTCGAGACACTTCAG           |
| FL. IN F1 (vet-2)  | CACAAAACCGGCCAAAAA             |
| FL. IN R1 (vet-2)  | TCGGTCTTGCAGAAACCAC            |
| OM-F               | CAACGTTTGC GTGTACAGAAG         |
| OM-R               | GGCTCACGTACGCAGCACTAC          |
